# Supplementary material for: Maternal/Child Social Support and Food Security in Relation to Child Height and BMI in Four Lmics: Mediation Analysis of Young Lives Data
Source: Research Square preprint supplement (doi:10.21203/rs.3.rs-673304/v1), 2021-07-12
Supplement: Supplementary file 1 [file 63ba427ba577f6bc07c8c961.docx]

Table S1. Questions for child’s social supports at wave 2.

| Is there someone who could help you~  1. if you were having a problem with your studies at school?  2. if you were worried about something at home?  3. if you were being teased or bullied by another child?  4. if you needed advice about a religious matter?  5. if you needed pocket money?  6. if you needed help getting to school or work? |
| --- |

Table S2. Descriptive statistics of study sample of Vietnam, Ethiopia, India, and Peru (wave 1)

|  | Vietnam | | | | Ethiopia | | | | India | | | | Peru | | | |
| --- | --- | --- | --- | --- | --- | --- | --- | --- | --- | --- | --- | --- | --- | --- | --- | --- |
|  | N | (%) | zhfa | zbfa | N | (%) | zhfa | zbfa | N | (%) | zhfa | zbfa | N | (%) | zhfa | zbfa |
| Gender |  |  |  |  |  |  |  |  |  |  |  |  |  |  |  |  |
| Male | 482 | (49.4) | -1.52 | -1.12 | 372 | (52.5) | -1.64 | -1.26 | 409 | (48.6) | -1.47 | -1.52 | 329 | (53.0) | -1.42 | 0.55 |
| Female | 493 | (50.6) | -1.41 | -1.14 | 336 | (47.5) | -1.34 | -1.29 | 433 | (51.4) | -1.57 | -1.27 | 292 | (47.0) | -1.35 | 0.43 |
| Birth order |  |  |  |  |  |  |  |  |  |  |  |  |  |  |  |  |
| 1st | 362 | (37.1) | -1.35 | -1.10 | 127 | (17.9) | -1.42 | -1.29 | 223 | (26.5) | -1.42 | -1.45 | 187 | (30.1) | -1.16 | 0.50 |
| 2nd | 297 | (30.5) | -1.36 | -1.11 | 121 | (17.1) | -1.63 | -1.13 | 285 | (33.9) | -1.47 | -1.35 | 156 | (25.1) | -1.30 | 0.39 |
| 3rd | 149 | (15.3) | -1.51 | -1.31 | 109 | (15.4) | -1.52 | -1.38 | 176 | (20.9) | -1.64 | -1.34 | 97 | (15.6) | -1.39 | 0.48 |
| Higher than 4th | 167 | (17.1) | -1.88 | -1.08 | 351 | (49.6) | -1.47 | -1.29 | 158 | (18.8) | -1.64 | -1.44 | 181 | (29.2) | -1.70 | 0.57 |
| Child’s working status |  |  |  |  |  |  |  |  |  |  |  |  |  |  |  |  |
| No |  |  | -1.43 | -1.13 | 218 | (30.9) | -1.55 | -1.36 | 572 | (67.9) | -1.52 | -1.38 | 549 | (88.4) | -1.34 | 0.52 |
| Yes |  |  | -1.47 | -1.13 | 487 | (69.1) | -1.47 | -1.23 | 270 | (32.1) | -1.52 | -1.41 | 72 | (11.6) | -1.71 | 0.28 |
| Age of caregiver |  |  |  |  |  |  |  |  |  |  |  |  |  |  |  |  |
| <30 | 188 | (19.3) | -1.59 | -1.23 | 206 | (29.1) | -1.66 | -1.32 | 363 | (43.1) | -1.56 | -1.40 | 180 | (29.0) | -1.37 | 0.45 |
| 30 ≤ & <35 | 363 | (37.2) | -1.43 | -1.13 | 171 | (24.2) | -1.49 | -1.18 | 242 | (28.7) | -1.47 | -1.38 | 177 | (28.5) | -1.38 | 0.55 |
| 35 ≤ & <40 | 224 | (23.0) | -1.43 | -1.15 | 174 | (24.6) | -1.45 | -1.32 | 152 | (18.1) | -1.48 | -1.36 | 122 | (19.7) | -1.50 | 0.48 |
| 40 ≤ | 200 | (20.5) | -1.46 | -1.02 | 157 | (22.2) | -1.36 | -1.26 | 85 | (10.1) | -1.60 | -1.41 | 142 | (22.9) | -1.32 | 0.49 |
| Marital status |  |  |  |  |  |  |  |  |  |  |  |  |  |  |  |  |
| Permanent partner | 931 | (95.5) | -1.46 | -1.13 | 578 | (81.6) | -1.47 | -1.26 | 803 | (95.4) | -1.51 | -1.39 | 530 | (85.4) | -1.39 | 0.48 |
| Divorced or single or widowed | 44 | (4.5) | -1.56 | -1.07 | 130 | (18.4) | -1.62 | -1.32 | 39 | (4.6) | -1.75 | -1.39 | 91 | (14.7) | -1.38 | 0.55 |
| Education of caregiver |  |  |  |  |  |  |  |  |  |  |  |  |  |  |  |  |
| Not completed primary | 313 | 32.1 | -1.74 | -1.01 | 579 | (81.8) | -1.55 | -1.36 | 592 | (70.3) | -1.65 | -1.44 | 65 | (10.5) | -1.89 | 0.44 |
| Completed primary | 662 | 67.9 | -1.34 | -1.19 | 129 | (18.2) | -1.31 | -0.94 | 250 | (29.7) | -1.22 | -1.27 | 556 | (89.5) | -1.33 | 0.50 |
| Having enough food (wave 1) |  |  |  |  |  |  |  |  |  |  |  |  |  |  |  |  |
| No | 11 | (1.1) | -1.76 | -1.44 | 157 | (22.2) | -1.70 | -1.27 | 22 | (2.6) | -2.02 | -0.91 | 110 | (17.7) | -1.53 | 0.61 |
| Yes | 960 | (98.9) | -1.46 | -1.13 | 551 | (77.8) | -1.44 | -1.28 | 820 | (97.4) | -1.51 | -1.40 | 511 | (82.3) | -1.36 | 0.47 |
| Food shortage (wave 2) |  |  |  |  |  |  |  |  |  |  |  |  |  |  |  |  |
| No | 874 | (91.2) | -1.40 | -1.00 | 526 | (65.1) | -1.28 | -1.64 | 848 | (90.2) | -1.49 | -1.46 | 459 | (72.4) | -1.41 | 0.27 |
| Yes | 84 | (8.8) | -1.91 | -1.10 | 282 | (34.9) | -1.58 | -1.76 | 92 | (9.8) | -1.90 | -1.61 | 175 | (27.6) | -1.66 | 0.25 |
| Household size |  |  |  |  |  |  |  |  |  |  |  |  |  |  |  |  |
| 1~4 | 457 | (46.9) | -1.29 | -1.13 | 125 | (17.7) | -1.69 | -1.18 | 246 | (29.2) | -1.43 | -1.43 | 192 | (30.9) | -1.05 | 0.59 |
| 5~6 | 399 | (40.9) | -1.56 | -1.18 | 232 | (32.8) | -1.39 | -1.35 | 430 | (51.1) | -1.50 | -1.37 | 250 | (40.3) | -1.54 | 0.39 |
| 6≤ | 119 | (12.2) | -1.84 | -0.96 | 351 | (49.6) | -1.50 | -1.26 | 166 | (19.7) | -1.72 | -1.39 | 179 | (28.8) | -1.53 | 0.53 |
| Wealth quintile |  |  |  |  |  |  |  |  |  |  |  |  |  |  |  |  |
| 1st | 198 | (20.3) | -1.82 | -0.97 | 153 | (21.6) | -1.74 | -1.22 | 174 | (20.7) | -1.65 | -1.52 | 123 | (19.8) | -1.84 | 0.33 |
| 2nd | 196 | (20.1) | -1.47 | -1.24 | 139 | (19.6) | -1.78 | -1.46 | 167 | (19.8) | -1.60 | -1.45 | 127 | (20.5) | -1.80 | 0.41 |
| 3rd | 196 | (20.1) | -1.60 | -1.34 | 146 | (20.6) | -1.61 | -1.45 | 155 | (18.4) | -1.72 | -1.40 | 126 | (20.3) | -1.30 | 0.50 |
| 4th | 196 | (20.1) | -1.38 | -1.30 | 131 | (18.5) | -1.40 | -1.32 | 168 | (20.0) | -1.51 | -1.32 | 122 | (19.7) | -1.10 | 0.67 |
| 5th | 189 | (19.4) | -1.05 | -0.79 | 139 | (19.6) | -1.04 | -0.95 | 178 | (21.1) | -1.17 | -1.27 | 123 | (19.9) | -0.88 | 0.56 |
| Residence place |  |  |  |  |  |  |  |  |  |  |  |  |  |  |  |  |
| Urban | 192 | (19.7) | -1.12 | -0.80 | 234 | (33.1) | -1.21 | -1.00 | 223 | (26.5) | -1.21 | -1.26 | 462 | (74.4) | -1.22 | 0.56 |
| Rural | 783 | (0.3) | -1.55 | -1.21 | 474 | (67.0) | -1.68 | -1.44 | 619 | (73.5) | -1.63 | -1.44 | 159 | (25.6) | -1.87 | 0.30 |
| Total | 975 |  | -1.47 | -1.13 | 708 |  | -1.50 | -1.27 |  |  | -1.52 | -1.39 |  |  | -1.38 | 0.49 |
